# Supplementary material for: Flexible parallel implicit modelling of coupled thermal–hydraulic–mechanical processes in fractured rocks
Source: Copernicus journal article supplement (doi:10.5194/se-8-921-2017), 2017-09-13
Supplement: Supplementary file 1 [file se-8-921-2017-supplement.zip]

Archive with 5 entries (4 files):
- se-8-921-2017-supplement-title-page.pdf
- Cacace_Jacquey_Supplementary_Material/
- Cacace_Jacquey_Supplementary_Material/Cacace_Jacquey_SI1.avi
- Cacace_Jacquey_Supplementary_Material/Cacace_Jacquey_4-4.avi
- Cacace_Jacquey_Supplementary_Material/Supplementary Information .pdf
