# Supplementary material for: Flexible parallel implicit modelling of coupled thermal–hydraulic–mechanical processes in fractured rocks
Source: Copernicus journal article supplement (doi:10.5194/se-8-921-2017), 2017-09-13
Supplement: Supplementary file 1 [file se-8-921-2017-supplement.zip › se-8-921-2017-supplement-title-page.pdf]

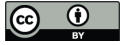

## *Supplement of*

# **Flexible parallel implicit modelling of coupled thermal–hydraulic–mechanical processes in fractured rocks**

**Mauro Cacace and Antoine B. Jacquy**

*Correspondence to:* Mauro Cacace ([mauro.cacace@gfz-potsdam.de](mailto:mauro.cacace@gfz-potsdam.de))

- [se-8-921-2017-supplement-title-page.pdf](#)
- [Cacace\\_Jacquy\\_Supplementary\\_Material](#)
  - [Cacace\\_Jacquy\\_4-4.avi](#)
  - [Cacace\\_Jacquy\\_SI1.avi](#)
  - [Supplementary Information .pdf](#)

The copyright of individual parts of the supplement might differ from the CC BY 3.0 License.
